# Supplementary material for: Control of pH-Responsiveness in Graphene Oxide Grafted with Poly-DEAEMA via Tailored Functionalization
Source: MDPI journal article supplement (doi:10.3390/nano10040614), 2020-03-27
Supplement: s1 [file s1]

**Supplementary Information for:**

**Control of pH-responsiveness in graphene oxide grafted with poly-DEAEMA via tailored functionalization**

Roxana Noriega-Navarro <sup>1</sup>, J  sica Castro-Medina <sup>1,2</sup>, Martha V. Esc  rcega-Bobadilla <sup>1,\*</sup> and Gustavo A. Zelada-Guill  n <sup>1,\*</sup>

<sup>1</sup> School of Chemistry, National Autonomous University of Mexico (UNAM), Circuito Escolar s/n, Ciudad Universitaria, Coyoac  n, Mexico City 04510, Mexico

<sup>2</sup> Escuela Nacional Preparatoria 8 Miguel E. Schulz, Lomas de Plateros s/n,   lvaro Obreg  n, Mexico City 01600, Mexico

**\*Correspondence:** mesbo@unam.mx (M.V.E.-B.); g.zelada@unam.mx (G.A.Z.-G.)

**Table of contents:**

Page S2: **Figure S1.** FT-IR spectrum of GO.

Page S2: **Figure S2.** FT-IR spectrum of GO-*g*-NHS.

Page S3: **Figure S3.** FT-IR spectrum of GO-*g*-AEMA.

Page S3: **Figure S4.** FT-IR spectrum of GO-*g*-poly[DEAEMA]

Page S4: **Figure S5.** SEM of pristine GO and after synthetic stage I.

Page S5: **Figure S6.** SEM of GO after synthetic stage II and after stage III.

Page S6: **Figure S7.** TEM micrograph of GO.

Page S6: **Figure S8.** TEM micrograph of GO-*g*-poly[DEAEMA].

Page S7: **Figure S9.** Swelling curves against pH for GO-*g*-poly[DEAEMA] and blank.

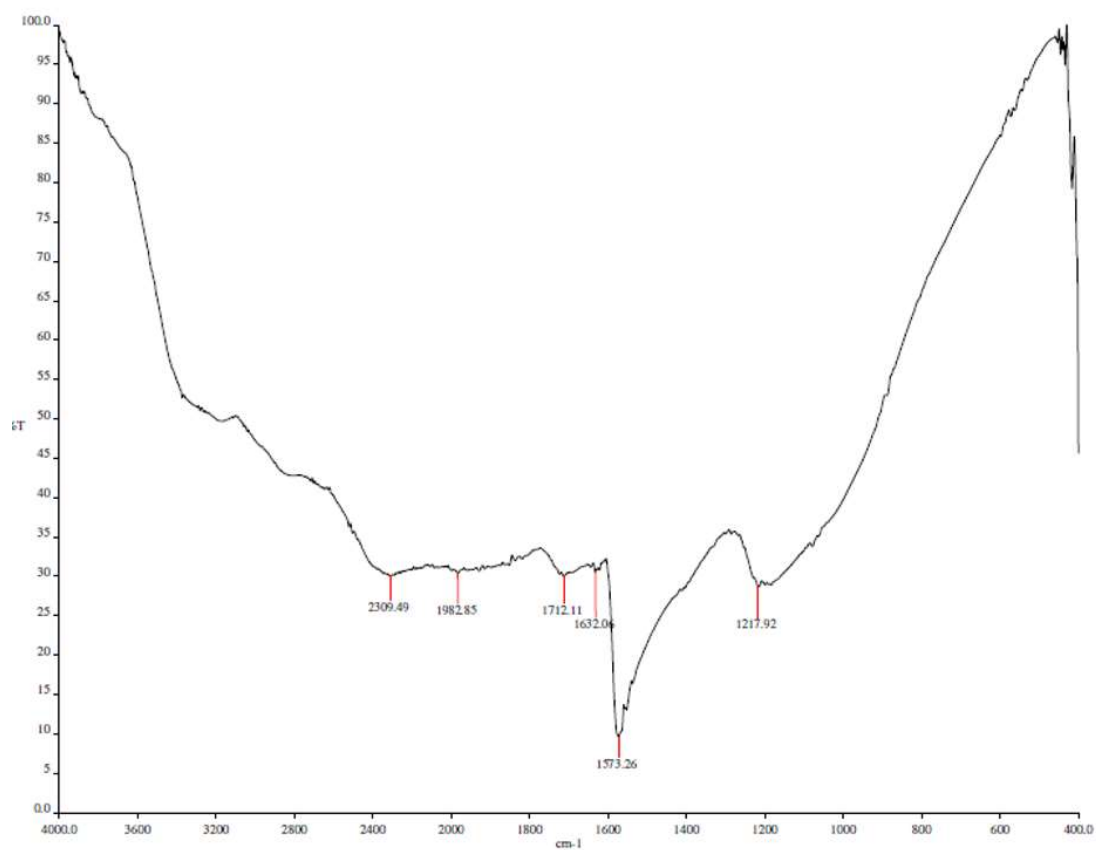

**Figure S1.** FT-IR spectrum of GO.

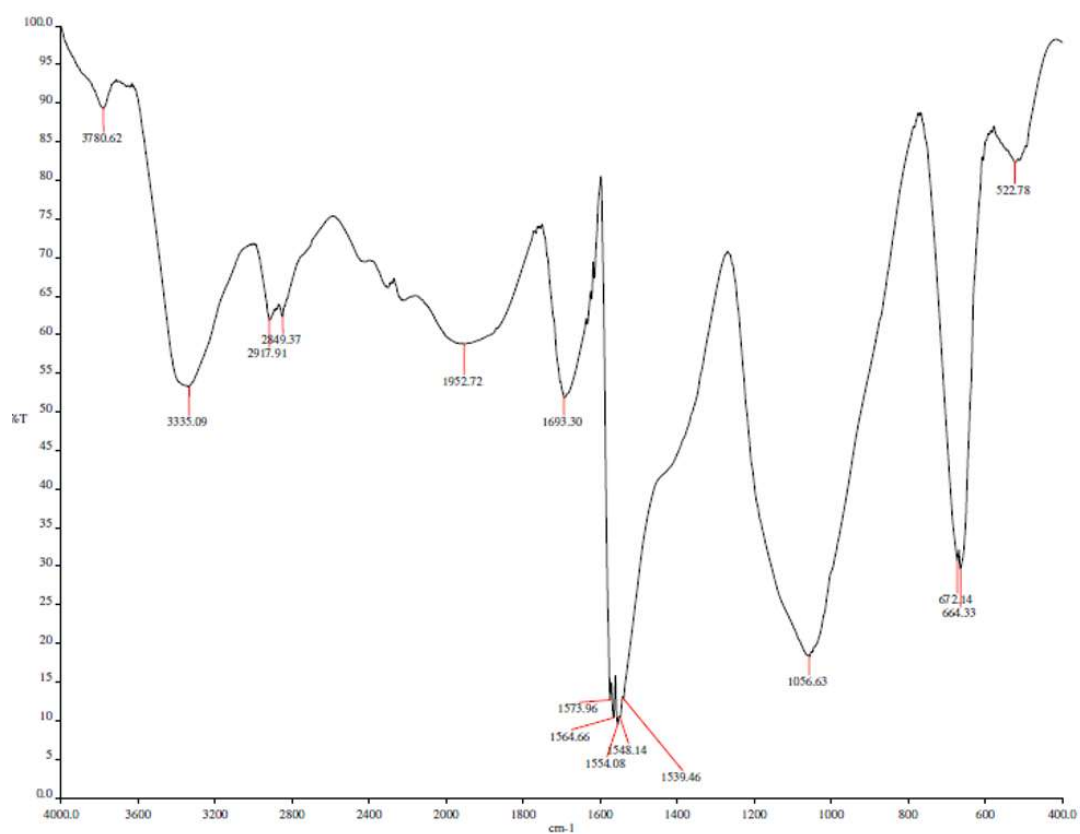

**Figure S2.** FT-IR spectrum of GO-g-NHS.

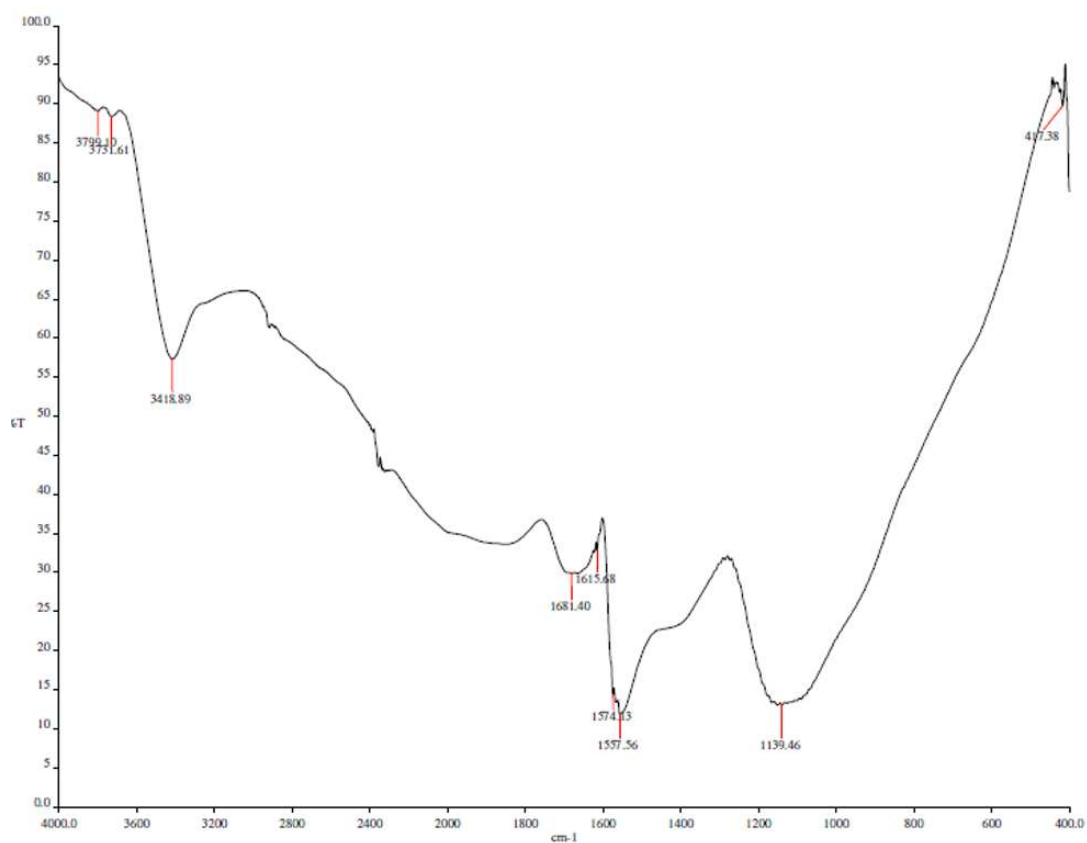

**Figure S3.** FT-IR spectrum of GO-*g*-AEMA.

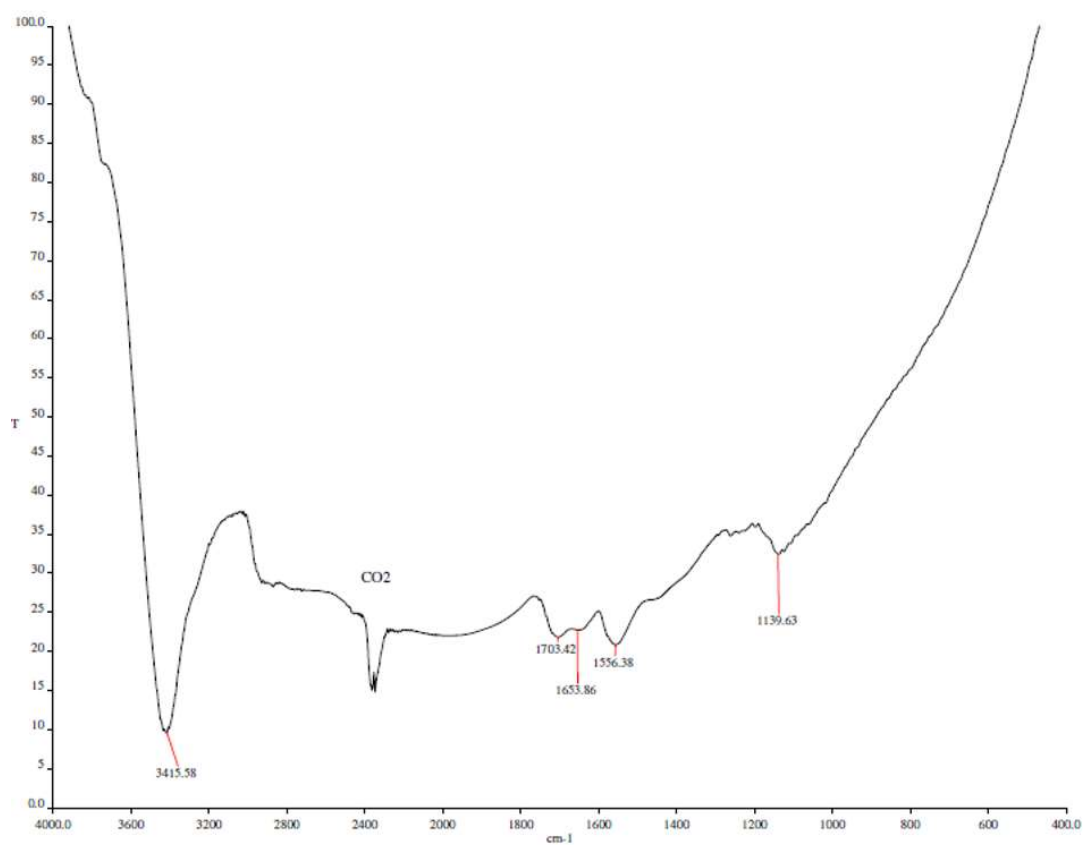

**Figure S4.** FT-IR spectrum of GO-*g*-poly[DEAEMA]

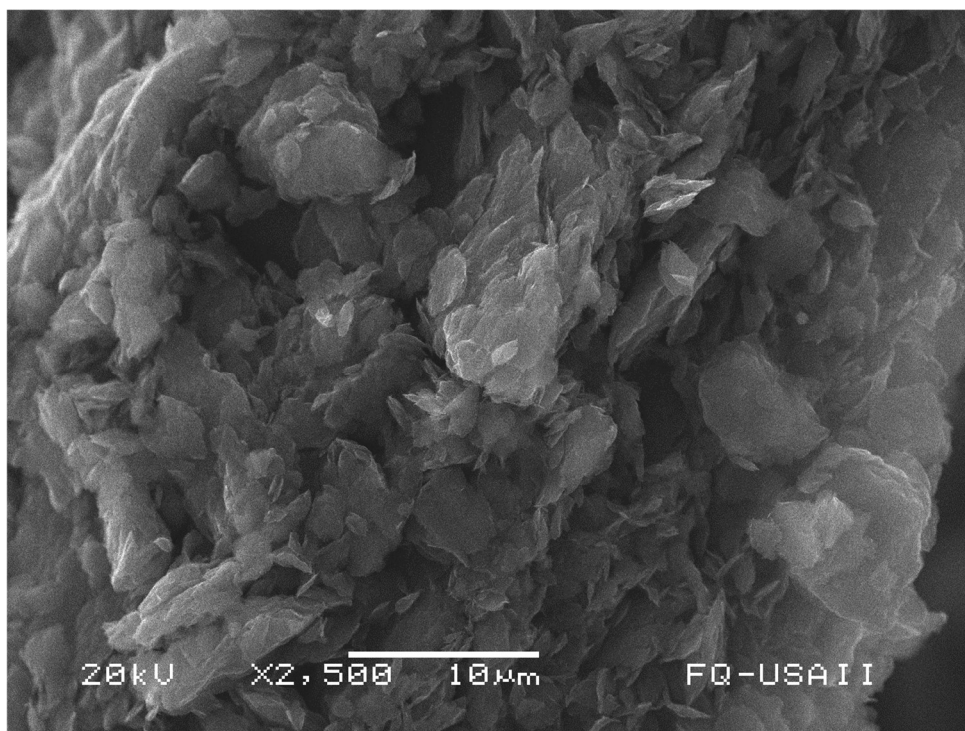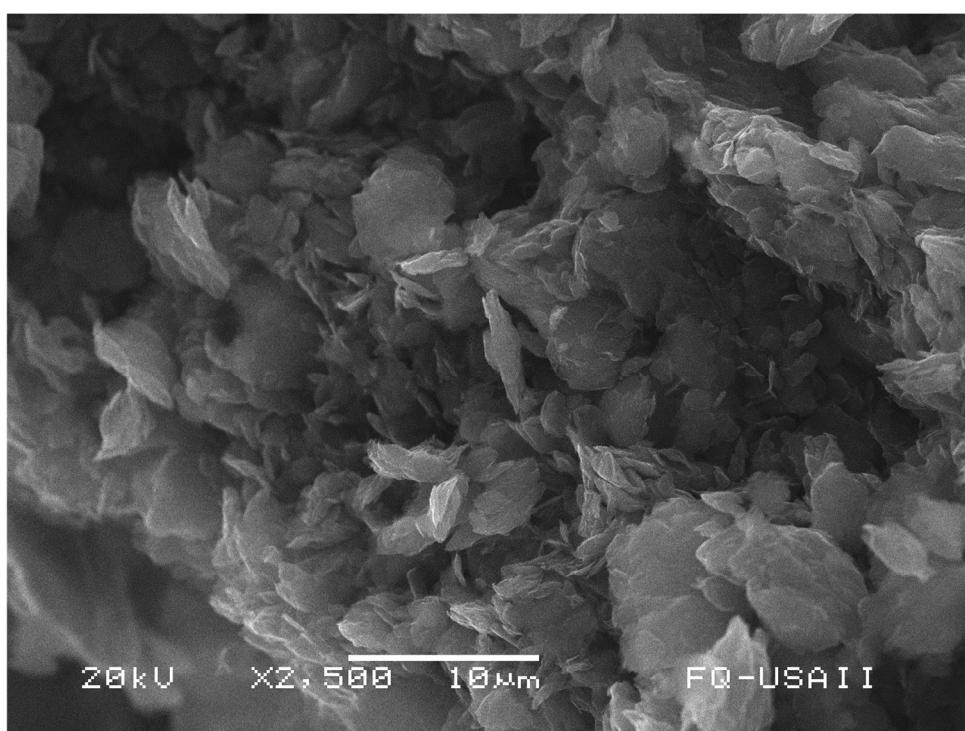

**Figure S5.** SEM of pristine GO (top) and after synthetic stage I (bottom).

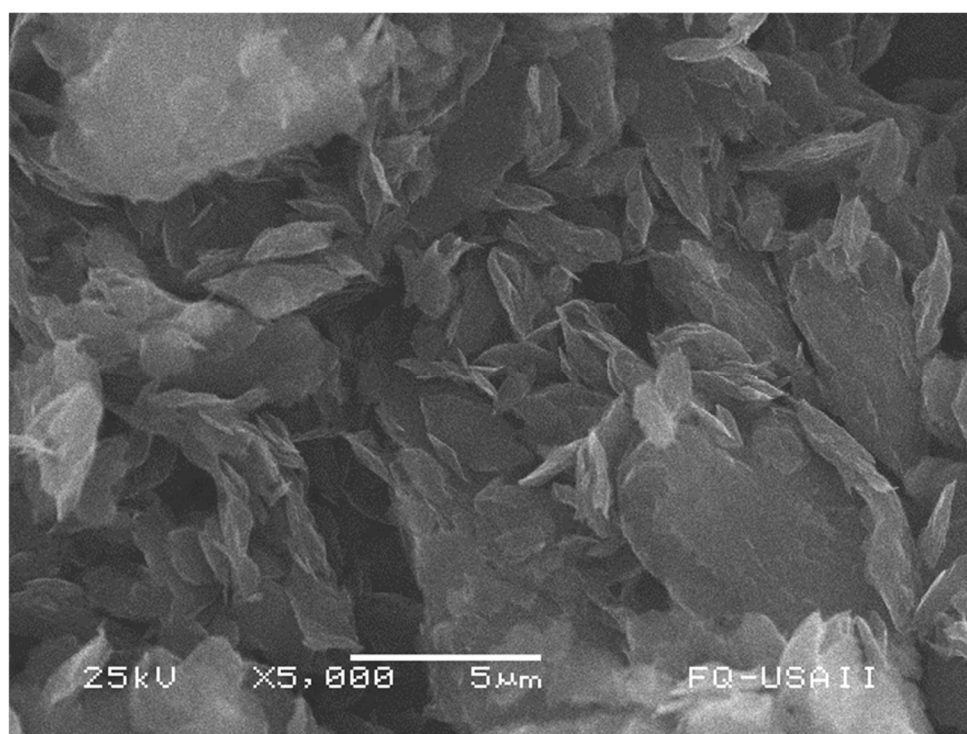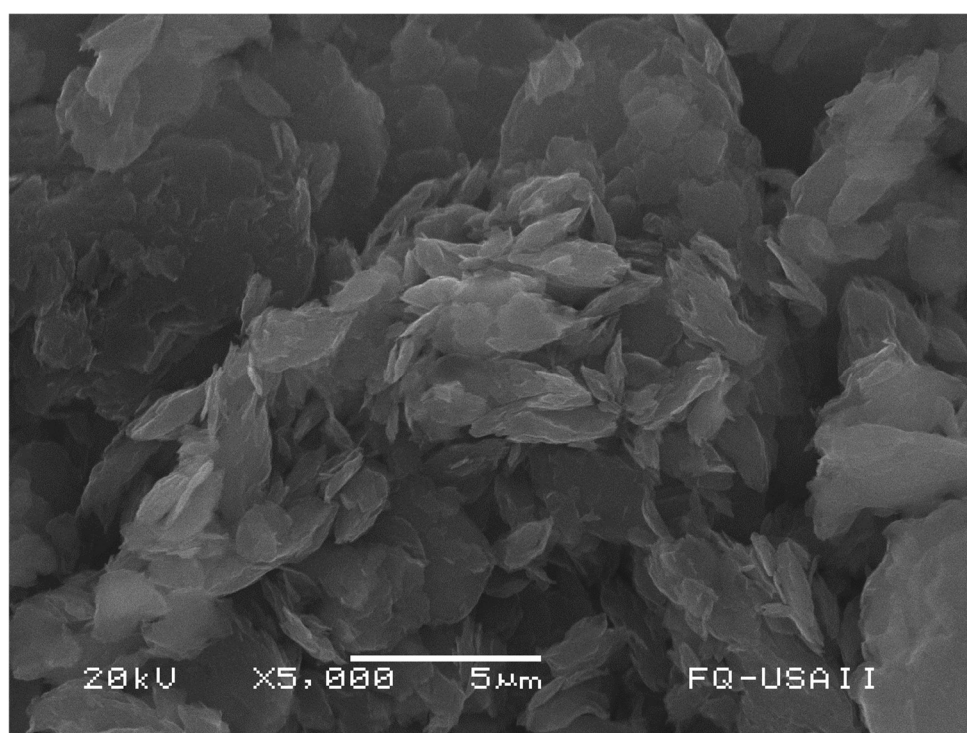

**Figure S6.** SEM of GO after synthetic stage II (top) and after stage III (bottom).



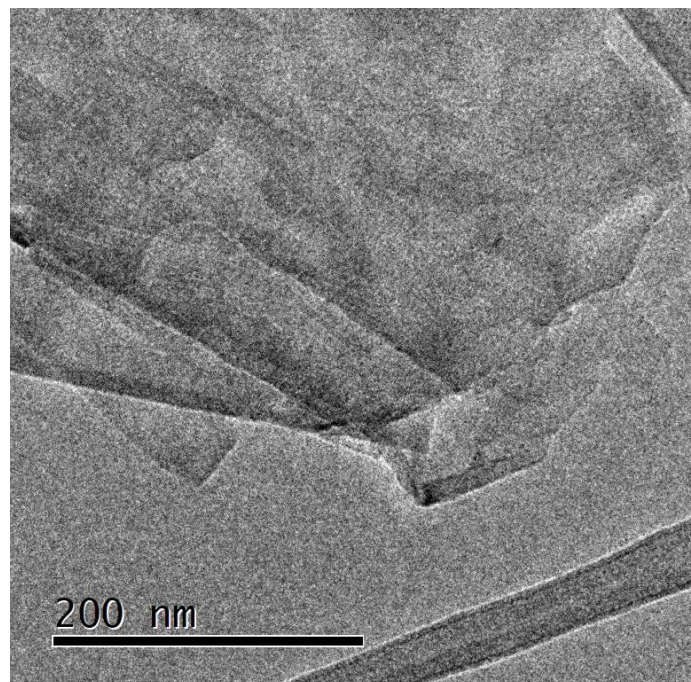

**Figure S7.** TEM micrograph of GO.

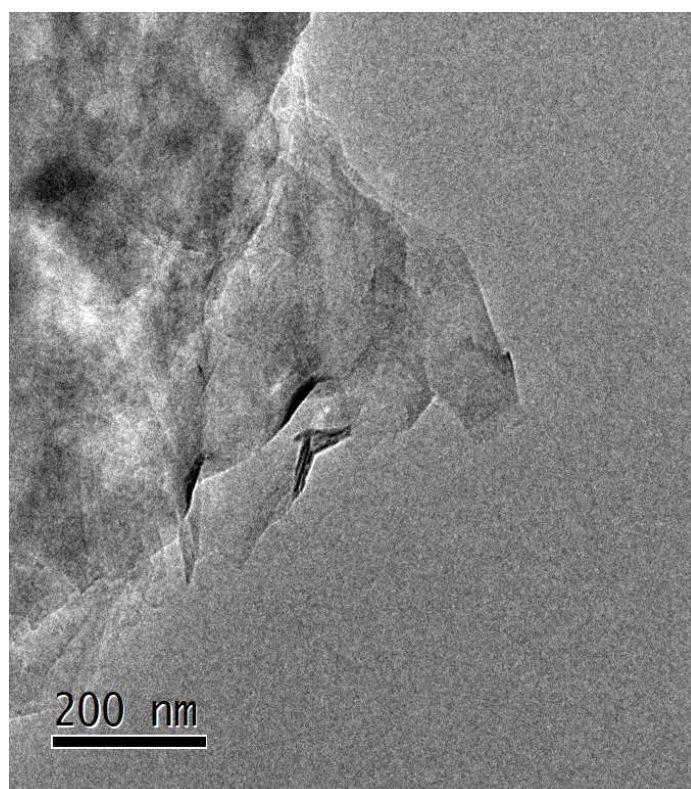

**Figure S8.** TEM micrograph of GO-*g*-poly[DEAEMA].

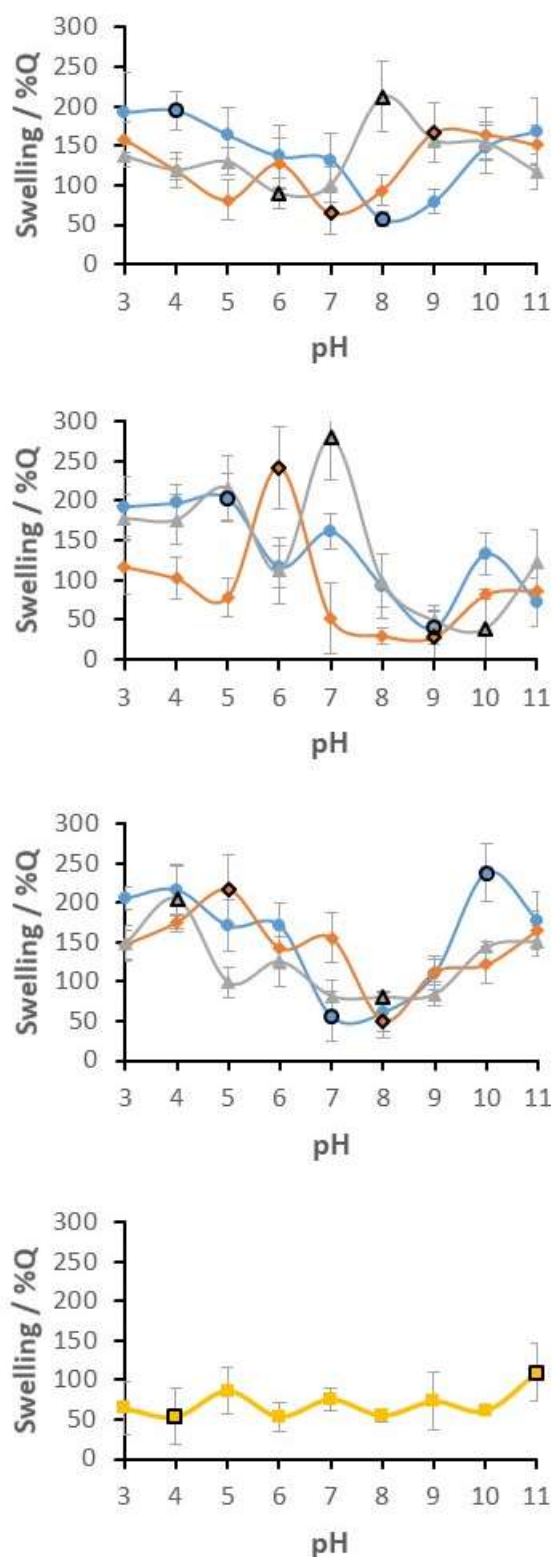

**Figure S9.** Swelling curves against pH for GO-g-poly[DEAEMA] (top three graphs) and blank (graph at the bottom). For GO-g-poly[DEAEMA], ratios at stage I (EDC:COOH@GO) are 2 mol/mol (first graph), 4 mol/mol (second graph) and 6 mol/mol (third graph); ratios at stage II (AEMA:GO-g-NHS) are 6 mmol/g (blue circles), 12 mmol/g (orange diamonds) and 24 mmol/g (grey triangles). %Q<sub>min</sub> and %Q<sub>max</sub> are highlighted in each curve. All the curves are set to the same scale in y axis for comparative purposes. Average values are for  $N = 3$ , error bars are 1 s.d.
